# Supplementary material for: Biocomposites prepared by alkaline phosphatase mediated mineralization of alginate microbeads
Source: Royal Society of Chemistry journal article supplement (doi:10.1039/c1ra00750e), 2011-12-19
Supplement: c1ra00750e.pdf [file c1ra00750e.pdf]

## Electronic Supplementary Information (ESI)

### **Biocomposites prepared by alkaline phosphatase mediated mineralization of alginate microbeads.**

Minli Xie <sup>a</sup>, Magnus Ø. Olderøy <sup>a</sup>, Zhibing Zhang <sup>b</sup>, Jens-Petter Andreassen <sup>c</sup>,  
Berit L. Strand <sup>d</sup>, Pawel Sikorski <sup>\*a</sup>

*a Department of Physics, Norwegian University of Science and Technology, Trondheim NO-7491, Norway*

*b School of Chemical Engineering, University of Birmingham, Edgbaston, Birmingham B15 2TT, UK.*

*c Department of Chemical Engineering, Norwegian University of Science and Technology, Trondheim NO-7491, Norway*

*d Department of Biotechnology, Norwegian University of Science and Technology, Trondheim NO-7491, Norway*

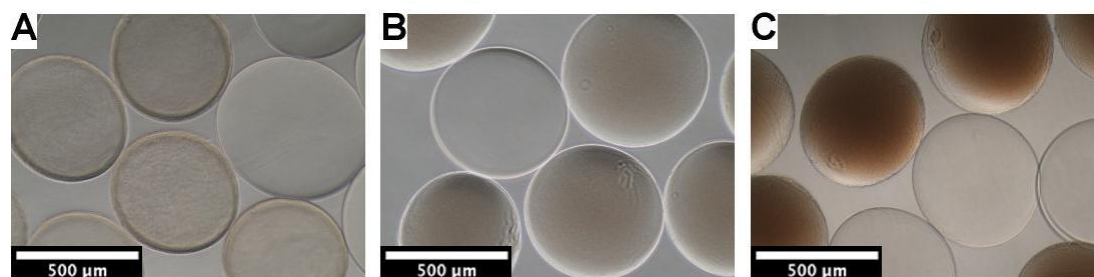

Figure 1. LM showing whole beads in wet condition: (A) Alg/CP-CD; (B) Alg/CP-ALP; (C) Alg/CP-ALP Cell. Non-mineralized alginate beads (transparent) were shown as a control.

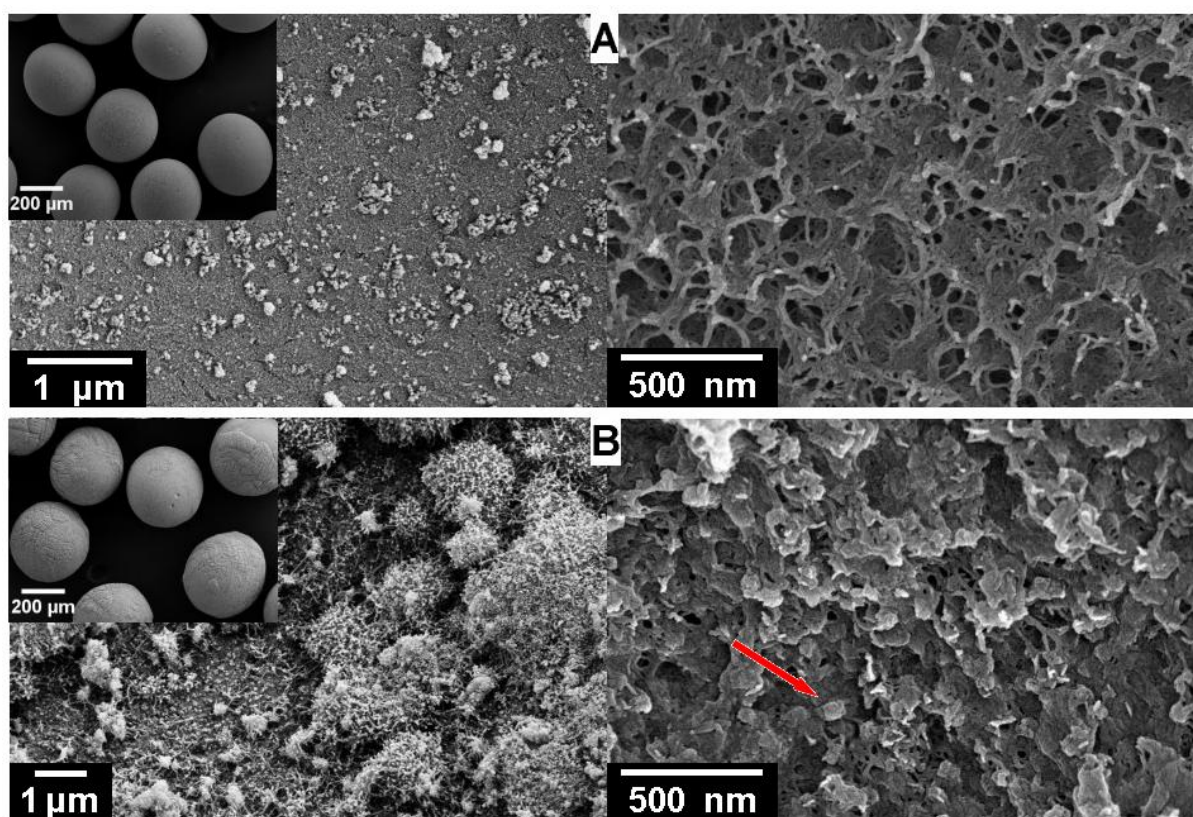

Figure 2. SEM micrographs of Alg/CP-ALP beads, surfaces (left) and internal structures (right): (A) was made with 0.1 mg/mL ALP and 2.5 mM  $\beta$ -glycerophosphate, pH 9, 24h, RT; (B) was made with 0.5 mg/mL ALP and 5 mM  $\beta$ -glycerophosphate, pH 9, 24h, RT. Red arrow shows the mineral domain containing nano-sized particles.

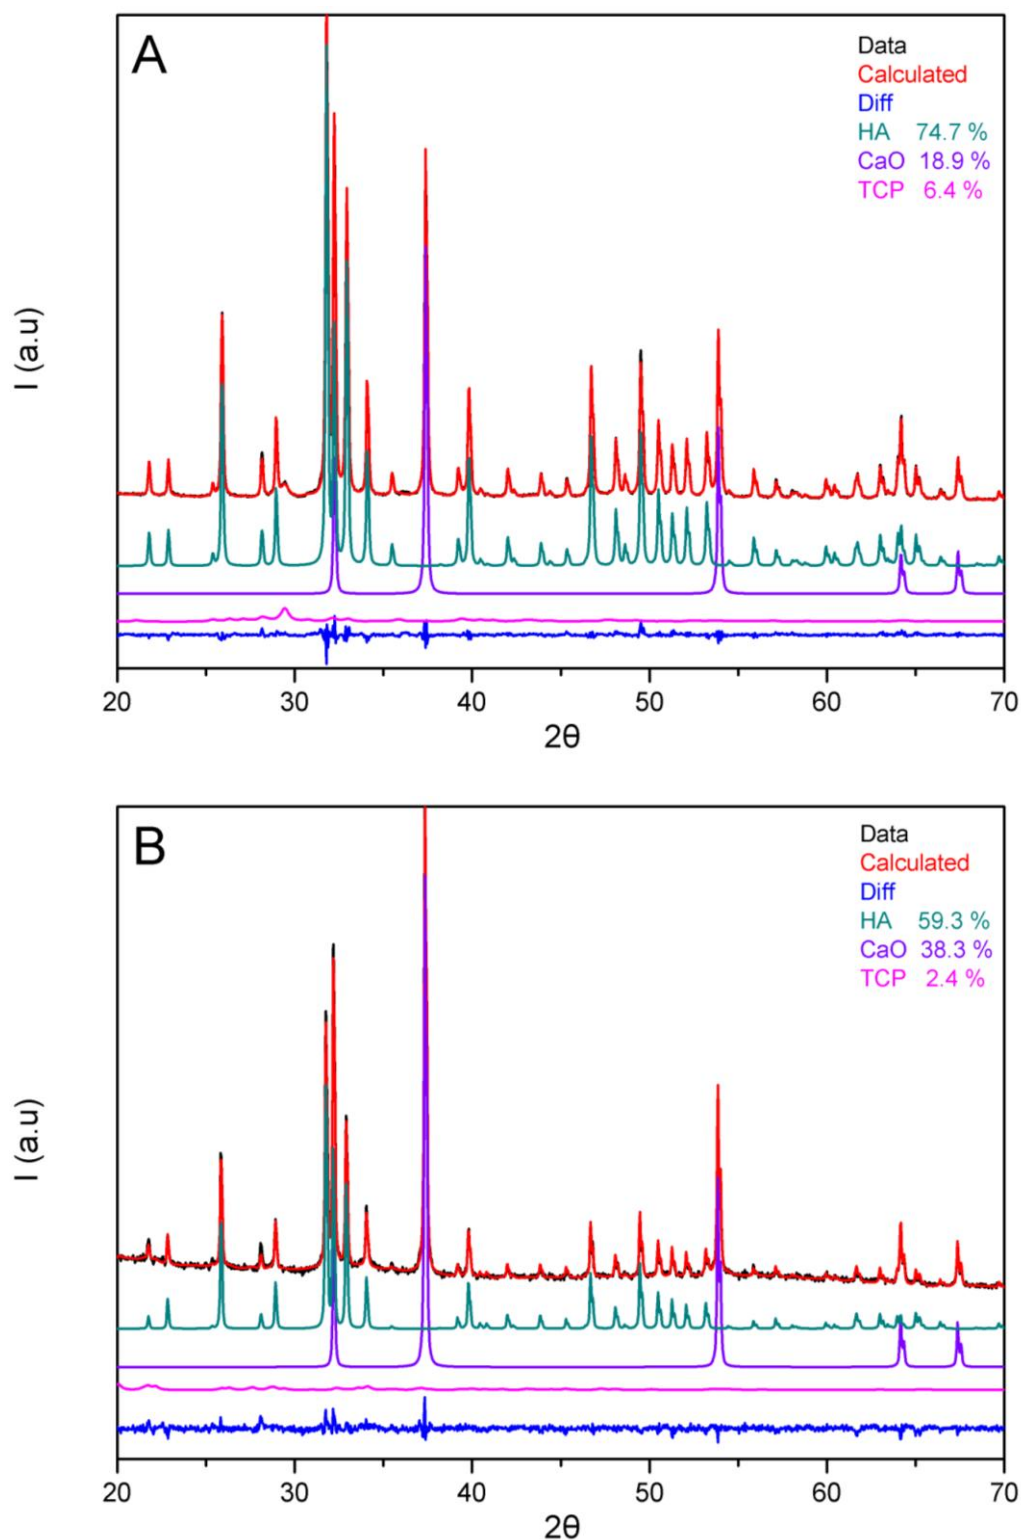

Figure 3. XRD patterns recorded for alginate/CP composites after heat treatment at 1000 °C. Black and red curves are raw- and refined data, respectively, while the blue curves show the difference between raw- and calculated data: (A) Alg/CP-CD, Rwp (%) is 4.41, and GOF is 1.76; (B) Alg/CP-ALP Cell, Rwp (%) is 5.87, and GOF is 1.38.
